# Supplementary material for: Delayed P100-Like Latencies in Multiple Sclerosis: A Preliminary Investigation Using Visual Evoked Spread Spectrum Analysis
Source: PLoS One. 2016 Jan 4;11(1):e0146084. doi: 10.1371/journal.pone.0146084 (PMC4699709; doi:10.1371/journal.pone.0146084)
Supplement: S1 Dataset — (XLSX) [file pone.0146084.s001.xlsx]

## Sheet: Kiiski et al. data
Variable Name	pptID	ppt_type	mo0_pptsubtype	Sex	EDU_years	Current_Tx_MS	Disease_duration_symptom	Disease_duration_Dx	relapse_prior24mofrombaseline_yn	relapse_after24mofrombaseline_yn	nb_relapse_prior24mofrombaseline	nb_relapse_priorafter24mofrombaseline	Optic_neuritis_hx_code	Optic_neuritis_blurred_hx_code	Visual_dysfunction_y_n	VisualAcuity_perComposite	VisualAcuity_perR	VisualAcuity_perL	VEP_tested	VEP_result	Time_between_ERP1_2_days	Time_between_ERP2_3_days	VESPA_y1_p100_amp	VESPA_y1_P100_latency	VESPA_y2_p100_amp	VESPA_y2_P100_latency	VESPA_y3_p100_amp	VESPA_y3_P100_latency	VESPA_y12change_P100_amp	VESPA_y12change_P100_latency	zVESPA_y12change_P100_amp	zVESPA_y12change_P100_latency
Variable Values		1=MS, 2=control	1=RR, 2=SP, 3=PP, 4=control	1=male, 2=female					1=relapses, 0=no relapses	1=relapses, 0=no relapses			0=no optic neuritis, 1=has optic neuritis	0=no optic neuritis, 1=has optic neuritis, blurred vision	0=no visual dysfunction, 1=visual dysfunction				0=no, 1=yes	0=normal, 1=abnormal
Variable Description	ID code of a participant		participant type at Month 0	sex of participant	years of education	current treatment for MS	disease duration from first symptom	disease duration from diagnosis			number of relapses during 24 months prior baseline	number of relapses during 24 months after baseline	history of optic neuritis	history of optic neuritis and/or blurred vision	history of visual dysfunction	visual acuity as percentage, both eyes	visual acuity as percentage, right eye	visual acuity as percentage, left eye			number of days between the ERP at Month 0 and Month 12	number of days between the ERP at Month 12 and Month 24	P100-like VESPA amplitude at Month 0	P100-like VESPA latency at Month 0	P100-like VESPA amplitude at Month 12	P100-like VESPA latency at Month 12	P100-like VESPA amplitude at Month 24	P100-like VESPA latency at Month 24	P100 amplitude at Month 0 - P100 amplitude at Month 12	P100 latency at Month 0 - P100 latency at Month 12	standardised / z score P100 amplitude change (between Month 0 and Month 12)	standardised / z score P100 latency change (between Month 0 and Month 12)
"-999" indicates missing or n/a data
	ms1	1	1	2	19	clinical trial	7.24	1.24	1	1	2	2	0	0	1	1	1	1	1	1	399	441	0.9069	147.5	1.184	153.3	1.434	133.7	-0.28	-5.8	-0.19488	-0.1661
	ms2	1	1	1	12	interferon B-1b	2.83	1.83	0	0	0	0	0	0	0	1	1	1	0	-999	364	390	0.7718	176.9	1.021	257.2	0.6344	196.5	-0.25	-80.3	-0.16516	-3.18813
	ms3	1	1	2	16	interferon B-1b	12.14	4.14	0	0	0	0	0	0	0	1	1	1	0	-999	417	-999	-999	-999	4.041	116.1	-999	-999	-999	-999	-999	-999
	ms4	1	1	2	12	Natalizumab	9.74	6.74	1	1	1	3	1	1	1	1	1	1	0	-999	477	339	-999	-999	2.376	196.5	4.129	216.1	-999	-999	-999	-999
	ms5	1	1	2	18	Natalizumab	-999	-999	0	0	0	0	0	1	1	1	1	1	0	-999	-999	-999	1.478	226.9	-999	-999	-999	-999	-999	-999	-999	-999
	ms6	1	1	1	17	Natalizumab	4.96	2.96	1	1	1	1	1	1	0	-999	-999	-999	0	-999	442	352	1.995	96.48	3.456	139.6	2.243	125.9	-1.46	-43.12	-1.45616	-1.67996
	ms7	1	2	2	13	no tx	-999	-999	0	0	0	0	0	0	0	-999	-999	-999	0	-999	-999	-999	1.825	125.9	-999	-999	-999	-999	-999	-999	-999	-999
	ms8	1	1	2	16	interferon B-1a	4.68	2.68	1	1	1	2	0	0	0	1	1	1	1	1	351	458	1.65	135.7	2.224	172.9	2.555	134.7	-0.57	-37.2	-0.51119	-1.43982
	ms9	1	1	2	18	interferon B-1a	6.84	6.84	0	0	0	0	0	0	1	0.83	1	0.67	0	-999	359	425	3.029	204.3	1.806	196.5	-999	-999	1.22	7.8	1.40326	0.38557
	ms10	1	2	1	17	interferon B-1a	27.92	24.92	0	0	0	0	1	1	1	-999	-999	-999	1	1	342	442	0.857	243.5	0.8931	280.7	0.5747	269	-0.04	-37.2	0.06187	-1.43982
	ms11	1	1	2	13	Natalizumab	7.96	7.96	0	0	0	0	1	1	1	1	1	1	0	-999	-999	-999	-999	-999	-999	-999	-999	-999	-999	-999	-999	-999
	ms12	1	1	2	16	interferon B-1a	5.16	4.16	0	0	0	0	0	0	0	1	1	1	0	-999	-999	-999	3.514	137.6	-999	-999	-999	-999	-999	-999	-999	-999
	ms13	1	1	1	8	Natalizumab	2.29	1.29	0	0	0	0	0	0	0	0.58	0.17	1	0	-999	390	390	0.9344	167.1	0.7815	184.7	0.187	192.5	0.15	-17.6	0.26322	-0.64476
	ms14	1	1	1	13	interferon B-1b	11.65	6.65	0	0	0	0	0	0	1	0.17	0.1	0.25	0	-999	413	-999	-999	-999	-999	-999	-999	-999	-999	-999	-999	-999
	ms15	1	1	1	14	Natalizumab	5.09	4.09	0	0	0	0	1	1	1	0.83	1	0.67	1	1	444	329	1.423	267	1.815	227.8	2.52	229.8	-0.39	39.2	-0.31729	1.65929
	ms16	1	2	1	11	interferon B-1b	34.56	16.56	0	0	0	0	1	1	1	0.75	1	0.5	1	0	314	455	0.8685	159.2	0.5582	167.1	0.8099	172.9	0.31	-7.9	0.43091	-0.25129
	ms17	1	1	2	22	interferon B-1a	4.48	4.48	0	0	0	0	0	0	0	-999	-999	-999	0	-999	305	466	5.598	133.7	2.384	133.7	3.459	159.2	3.21	0	3.5244	0.06917
	ms18	1	1	2	13	interferon B-1b	9.01	2.01	0	0	0	0	0	0	0	1	1	1	0	-999	391	348	2.037	171	2.595	184.7	3.489	221.9	-0.56	-13.7	-0.49414	-0.48656
	ms19	1	1	2	16	interferon B-1b	16.53	11.53	0	0	0	0	0	0	0	-999	-999	-999	0	-999	455	383	1.45	243.5	1.288	236.7	1.543	251.3	0.16	6.8	0.27292	0.34501
	ms20	1	2	2	12	no tx	43.65	33.65	0	0	0	0	1	1	1	0.5	0.5	0.5	0	-999	379	378	-999	-999	2.268	270.9	1.227	249.4	-999	-999	-999	-999
	ms21	1	2	2	-999	no tx	12.48	9.48	0	0	0	0	0	0	0	-999	-999	-999	0	-999	-999	-999	-999	-999	-999	-999	-999	-999	-999	-999	-999	-999
	ms22	1	2	2	13	no tx	28.24	28.24	0	0	0	0	0	1	1	0.25	0.33	0.17	0	-999	232	469	-999	-999	-999	-999	-999	-999	-999	-999	-999	-999
	ms23	1	2	1	16	interferon B-1b	27.9	27.9	0	0	0	0	0	0	0	0.5	0.33	0.67	0	-999	279	420	0.9885	184.7	1.106	123.9	-999	-999	-0.12	60.8	-0.02485	2.53547
	ms24	1	2	2	16	no tx	20.42	18.42	0	0	0	0	0	0	0	-999	-999	-999	0	-999	281	420	6.34	188.6	-999	-999	0.1429	131.8	-999	-999	-999	-999
	ms25	1	1	2	17	interferon B-1a	13.76	3.76	0	0	0	0	0	1	1	1	1	1	0	-999	-999	-999	1.361	140.6	-999	-999	-999	-999	-999	-999	-999	-999
	ms26	1	1	2	11	interferon B-1a	20.04	6.04	0	0	0	0	1	1	1	1	1	1	0	-999	280	416	1.884	125.9	1.424	137.6	0.7858	169	0.46	-11.7	0.59039	-0.40543
	ms27	1	1	2	15	interferon B-1b	9.59	3.59	0	0	0	0	0	0	1	1	1	1	0	-999	268	422	0.3894	202.3	0.4406	214.1	0.912	237.6	-0.05	-11.8	0.04578	-0.40949
	ms28	1	1	2	18	interferon B-1b	18.16	14.16	0	0	0	0	0	0	1	1	1	1	0	-999	-999	-999	0.9287	178.8	-999	-999	-999	-999	-999	-999	-999	-999
	ms29	1	2	2	14	no tx	27.72	8.72	0	0	0	0	1	1	1	0.3	-999	0.3	0	-999	217	-999	2.71	192.5	-999	-999	-999	-999	-999	-999	-999	-999
	ms30	1	2	1	17	no tx	21.37	21.37	0	0	0	0	1	1	1	0.83	0.67	1	0	-999	-999	-999	0.1519	184.7	-999	-999	-999	-999	-999	-999	-999	-999
	ms31	1	2	1	-999	no tx	23.84	23.84	0	0	0	0	1	1	1	0.83	0.67	1	1	0	-999	-999	1.617	180.8	-999	-999	-999	-999	-999	-999	-999	-999
	ms32	1	2	1	8	no tx	2.58	2.58	0	0	0	0	1	1	1	0.1	0.1	0.1	0	-999	-999	-999	-999	-999	-999	-999	-999	-999	-999	-999	-999	-999
	ms33	1	2	1	8	no tx	20.71	19.71	0	0	0	0	1	1	1	0.83	0.67	1	1	0	-999	-999	-999	-999	-999	-999	-999	-999	-999	-999	-999	-999
	ms34	1	2	1	8	interferon B-1b	29.67	29.67	0	0	0	0	0	0	0	1	1	1	0	-999	-999	-999	-999	-999	-999	-999	-999	-999	-999	-999	-999	-999
	ms35	1	2	1	14	no tx	28.25	18.25	0	0	0	0	0	0	1	0.83	0.67	1	1	1	-999	-999	0.9189	249.4	-999	-999	-999	-999	-999	-999	-999	-999
	ms36	1	2	1	12	interferon B-1a	15.69	14.69	0	0	0	0	0	0	1	-999	-999	-999	1	0	-999	-999	1.634	298.4	-999	-999	-999	-999	-999	-999	-999	-999
	ms37	1	2	2	11	no tx	17.62	17.62	0	0	0	0	1	1	1	1	1	1	0	-999	441	-999	2.815	263.1	1.75	263.1	-999	-999	1.07	0	1.23494	0.06917
	ms38	1	2	1	8	no tx	17.89	15.89	0	0	0	0	0	0	0	1	1	1	1	1	-999	-999	1.358	218	-999	-999	-999	-999	-999	-999	-999	-999
	ms39	1	2	1	19	no tx	17.35	10.35	0	0	0	0	0	0	1	1	1	1	0	-999	-999	-999	1.009	221.9	1.731	208.2	-999	-999	-0.72	13.7	-0.66886	0.6249
	ms40	1	2	1	18	interferon B-1a	36.11	12.11	0	0	0	0	1	1	1	1	1	1	0	-999	365	391	3.08	241.5	1.914	239.6	2.963	231.7	1.17	1.9	1.34254	0.14624
	ms41	1	2	1	11	interferon B-1a	24.95	24.95	0	0	0	0	1	1	1	1	1	1	0	-999	370	385	2.087	167.1	2.292	172.9	1.215	172.9	-0.2	-5.8	-0.11807	-0.1661
	ms42	1	1	1	11	Natalizumab	5.65	5.65	0	0	0	0	0	0	0	1	1	1	0	-999	358	389	2.817	210.2	2.6	221.9	3.525	227.8	0.22	-11.7	0.33151	-0.40543
	ms43	1	2	1	12	no tx	17.42	13.42	0	0	0	0	0	0	1	0.5	0.5	0.5	0	-999	371	-999	0.8486	172.9	1.284	127.8	-999	-999	-0.44	45.1	-0.36353	1.89862
	ms44	1	1	1	18	-999	2	1	1	3	3	3	0	0	0	0.67	0.67	0.67	0	-999	-999	-999	1.943	167.1	-999	-999	-999	-999	-999	-999	-999	-999
	ms45	1	2	2	18	-999	13	12	0	0	0	0	1	1	0	-999	-999	-999	0	-999	-999	-999	3.537	151.4	-999	-999	-999	-999	-999	-999	-999	-999
	ms46	1	2	2	20	-999	20	14	1	1	1	1	0	0	0	-999	-999	-999	0	-999	-999	-999	2.468	167.1	-999	-999	-999	-999	-999	-999	-999	-999
	ms47	1	1	1	18	-999	4	4	0	0	0	0	1	1	1	0.67	1	0.33	0	-999	-999	-999	1.715	188.6	-999	-999	-999	-999	-999	-999	-999	-999
	ms48	1	1	2	13	-999	14.82	14.82	0	0	0	0	1	1	0	-999	-999	-999	1	1	-999	-999	2.183	183.7	-999	-999	-999	-999	-999	-999	-999	-999
	ms49	1	1	1	19	-999	3.48	3.48	1	1	1	1	0	0	0	0.83	0.67	1	0	-999	-999	-999	-999	-999	-999	-999	-999	-999	-999	-999	-999	-999
	ms50	1	1	1	17	-999	15.98	11.98	0	0	0	0	1	1	0	1.2	1.2	1.2	0	-999	-999	-999	1.761	143.5	-999	-999	-999	-999	-999	-999	-999	-999
	ms51	1	1	1	11	-999	-999	-999	1	1	1	1	0	0	0	1	1	1	1	0	-999	-999	-999	-999	-999	-999	-999	-999	-999	-999	-999	-999
	ms52	1	2	2	20	-999	38.62	21.62	0	0	0	0	1	1	0	-999	-999	-999	0	-999	-999	-999	1.315	218	-999	-999	-999	-999	-999	-999	-999	-999
	ms53	1	1	1	15	-999	4.65	4.65	0	0	0	0	1	1	0	1	1	1	0	-999	-999	-999	1.909	189.6	-999	-999	-999	-999	-999	-999	-999	-999
	ms54	1	1	1	15	-999	7.18	2.18	1	1	1	1	0	0	1	1.2	1.2	1.2	1	0	-999	-999	-999	-999	-999	-999	-999	-999	-999	-999	-999	-999
	ms55	1	1	1	21	-999	19.39	18.39	1	1	1	1	1	1	1	0.83	0.67	1	0	-999	-999	-999	1.446	218	-999	-999	-999	-999	-999	-999	-999	-999
	ms56	1	2	1	13	-999	17.56	15.56	0	0	0	0	1	1	0	-999	-999	-999	0	-999	-999	-999	2.645	172.9	-999	-999	-999	-999	-999	-999	-999	-999
	c1	2	4	1	-999	-999	-999	-999	-999	-999	-999	-999	-999	-999	-999	-999	-999	-999	0	-999	-999	-999	-999	-999	-999	-999	-999	-999	-999	-999	-999	-999
	c2	2	4	1	-999	-999	-999	-999	-999	-999	-999	-999	-999	-999	-999	-999	-999	-999	0	-999	-999	-999	-999	-999	-999	-999	-999	-999	-999	-999	-999	-999
	c3	2	4	1	-999	-999	-999	-999	-999	-999	-999	-999	-999	-999	-999	-999	-999	-999	0	-999	-999	-999	-999	-999	-999	-999	-999	-999	-999	-999	-999	-999
	c4	2	4	2	-999	-999	-999	-999	-999	-999	-999	-999	-999	-999	-999	-999	-999	-999	0	-999	-999	-999	-999	-999	-999	-999	-999	-999	-999	-999	-999	-999
	c5	2	4	2	21	-999	-999	-999	-999	-999	-999	-999	-999	-999	-999	-999	-999	-999	0	-999	-999	-999	3.487	169	-999	-999	-999	-999	-999	-999	-999	-999
	c6	2	4	1	19	-999	-999	-999	-999	-999	-999	-999	-999	-999	-999	-999	-999	-999	0	-999	396	-999	4.883	174.9	3.387	174.9	-999	-999	1.5	0	1.69411	0.06917
	c7	2	4	1	-999	-999	-999	-999	-999	-999	-999	-999	-999	-999	-999	-999	-999	-999	0	-999	-999	-999	-999	-999	-999	-999	-999	-999	-999	-999	-999	-999
	c8	2	4	1	-999	-999	-999	-999	-999	-999	-999	-999	-999	-999	-999	-999	-999	-999	0	-999	-999	-999	-999	-999	-999	-999	-999	-999	-999	-999	-999	-999
	c9	2	4	1	-999	-999	-999	-999	-999	-999	-999	-999	-999	-999	-999	-999	-999	-999	0	-999	-999	-999	-999	-999	-999	-999	-999	-999	-999	-999	-999	-999
	c10	2	4	1	-999	-999	-999	-999	-999	-999	-999	-999	-999	-999	-999	-999	-999	-999	0	-999	-999	-999	-999	-999	-999	-999	-999	-999	-999	-999	-999	-999
	c11	2	4	2	-999	-999	-999	-999	-999	-999	-999	-999	-999	-999	-999	-999	-999	-999	0	-999	-999	-999	-999	-999	-999	-999	-999	-999	-999	-999	-999	-999
	c12	2	4	1	-999	-999	-999	-999	-999	-999	-999	-999	-999	-999	-999	-999	-999	-999	0	-999	-999	-999	-999	-999	-999	-999	-999	-999	-999	-999	-999	-999
	c13	2	4	1	-999	-999	-999	-999	-999	-999	-999	-999	-999	-999	-999	-999	-999	-999	0	-999	-999	-999	-999	-999	-999	-999	-999	-999	-999	-999	-999	-999
	c14	2	4	1	-999	-999	-999	-999	-999	-999	-999	-999	-999	-999	-999	-999	-999	-999	0	-999	-999	-999	2.037	171	-999	-999	-999	-999	-999	-999	-999	-999
	c15	2	4	1	-999	-999	-999	-999	-999	-999	-999	-999	-999	-999	-999	-999	-999	-999	0	-999	-999	-999	-999	-999	-999	-999	-999	-999	-999	-999	-999	-999
	c16	2	4	1	-999	-999	-999	-999	-999	-999	-999	-999	-999	-999	-999	-999	-999	-999	0	-999	-999	-999	5.05	122	-999	-999	-999	-999	-999	-999	-999	-999
	c17	2	4	1	-999	-999	-999	-999	-999	-999	-999	-999	-999	-999	-999	-999	-999	-999	0	-999	-999	-999	-999	-999	-999	-999	-999	-999	-999	-999	-999	-999
	c18	2	4	1	-999	-999	-999	-999	-999	-999	-999	-999	-999	-999	-999	-999	-999	-999	0	-999	-999	-999	1.528	122	-999	-999	-999	-999	-999	-999	-999	-999
	c19	2	4	2	-999	-999	-999	-999	-999	-999	-999	-999	-999	-999	-999	-999	-999	-999	0	-999	-999	-999	1.749	122	-999	-999	-999	-999	-999	-999	-999	-999
	c20	2	4	2	-999	-999	-999	-999	-999	-999	-999	-999	-999	-999	-999	-999	-999	-999	0	-999	-999	-999	-999	-999	-999	-999	-999	-999	-999	-999	-999	-999
	c21	2	4	2	-999	-999	-999	-999	-999	-999	-999	-999	-999	-999	-999	-999	-999	-999	0	-999	-999	-999	-999	-999	-999	-999	-999	-999	-999	-999	-999	-999
	c22	2	4	2	19	-999	-999	-999	-999	-999	-999	-999	-999	-999	-999	-999	-999	-999	0	-999	414	422	2.631	155.3	1.531	164.1	2.388	137.6	1.1	-8.8	1.27222	-0.28779
	c23	2	4	2	19	-999	-999	-999	-999	-999	-999	-999	-999	-999	-999	-999	-999	-999	0	-999	406	-999	4.762	171	4.818	169	-999	-999	-0.06	2	0.04067	0.1503
	c24	2	4	1	18	-999	-999	-999	-999	-999	-999	-999	-999	-999	-999	-999	-999	-999	0	-999	406	363	3.381	125.9	2.587	127.8	2.823	127.8	0.79	-1.9	0.94622	-0.0079
	c25	2	4	1	18	-999	-999	-999	-999	-999	-999	-999	-999	-999	-999	-999	-999	-999	0	-999	379	-999	2.861	186.7	3.812	182.7	-999	-999	-0.95	4	-0.91283	0.23143
	c26	2	4	2	22	-999	-999	-999	-999	-999	-999	-999	-999	-999	-999	-999	-999	-999	0	-999	372	-999	1.518	167.1	1.186	169	-999	-999	0.33	-1.9	0.45403	-0.0079
	c27	2	4	1	19	-999	-999	-999	-999	-999	-999	-999	-999	-999	-999	-999	-999	-999	0	-999	-999	-999	0.9832	123.9	-999	-999	-999	-999	-999	-999	-999	-999
	c28	2	4	1	13	-999	-999	-999	-999	-999	-999	-999	-999	-999	-999	-999	-999	-999	0	-999	-999	-999	1.947	176.9	-999	-999	-999	-999	-999	-999	-999	-999
	c29	2	4	2	17	-999	-999	-999	-999	-999	-999	-999	-999	-999	-999	-999	-999	-999	0	-999	-999	-999	1.861	180.8	-999	-999	-999	-999	-999	-999	-999	-999
	c30	2	4	1	13	-999	-999	-999	-999	-999	-999	-999	-999	-999	-999	-999	-999	-999	0	-999	378	407	1.023	233.7	1.904	255.3	0.8373	225.9	-0.88	-21.6	-0.83825	-0.80701
	c31	2	4	1	17	-999	-999	-999	-999	-999	-999	-999	-999	-999	-999	-999	-999	-999	0	-999	-999	-999	2.595	176.9	-999	-999	-999	-999	-999	-999	-999	-999
	c32	2	4	2	17	-999	-999	-999	-999	-999	-999	-999	-999	-999	-999	-999	-999	-999	0	-999	-999	-999	5.445	147.5	-999	-999	-999	-999	-999	-999	-999	-999
	c33	2	4	2	19	-999	-999	-999	-999	-999	-999	-999	-999	-999	-999	-999	-999	-999	0	-999	419	-999	3.009	129.8	3.22	127.8	-999	-999	-0.21	2	-0.12446	0.1503
	c34	2	4	2	20	-999	-999	-999	-999	-999	-999	-999	-999	-999	-999	-999	-999	-999	0	-999	357	384	1.808	208.2	2.77	214.1	1.814	210.2	-0.96	-5.9	-0.92455	-0.17016
	c35	2	4	2	18	-999	-999	-999	-999	-999	-999	-999	-999	-999	-999	-999	-999	-999	0	-999	-999	-999	2.682	120	-999	-999	-999	-999	-999	-999	-999	-999
	c36	2	4	2	16	-999	-999	-999	-999	-999	-999	-999	-999	-999	-999	-999	-999	-999	0	-999	-999	-999	3.832	132.7	-999	-999	-999	-999	-999	-999	-999	-999
	c37	2	4	2	16	-999	-999	-999	-999	-999	-999	-999	-999	-999	-999	-999	-999	-999	0	-999	357	395	-999	-999	-999	-999	-999	-999	-999	-999	-999	-999
	c38	2	4	1	21	-999	-999	-999	-999	-999	-999	-999	-999	-999	-999	-999	-999	-999	0	-999	373	355	1.366	131.8	1.627	172.9	1.851	131.8	-0.26	-41.1	-0.17773	-1.59802
	c39	2	4	1	17	-999	-999	-999	-999	-999	-999	-999	-999	-999	-999	-999	-999	-999	0	-999	-999	-999	2.732	164.1	-999	-999	-999	-999	-999	-999	-999	-999
	c40	2	4	1	22	-999	-999	-999	-999	-999	-999	-999	-999	-999	-999	-999	-999	-999	0	-999	366	372	1.978	127.8	2.901	108.8	4.231	180.8	-0.92	19	-0.883	0.83989
	c41	2	4	2	18	-999	-999	-999	-999	-999	-999	-999	-999	-999	-999	-999	-999	-999	0	-999	389	330	-999	-999	-999	-999	-999	-999	-999	-999	-999	-999
	c42	2	4	1	18	-999	-999	-999	-999	-999	-999	-999	-999	-999	-999	-999	-999	-999	0	-999	391	354	1.972	172.9	1.923	180.8	2.4	174.9	0.05	-7.9	0.15253	-0.25129
	c43	2	4	1	21	-999	-999	-999	-999	-999	-999	-999	-999	-999	-999	-999	-999	-999	0	-999	-999	-999	2.557	174.9	-999	-999	-999	-999	-999	-999	-999	-999
	c44	2	4	2	16	-999	-999	-999	-999	-999	-999	-999	-999	-999	-999	-999	-999	-999	0	-999	-999	-999	3.451	143.5	-999	-999	-999	-999	-999	-999	-999	-999
	c45	2	4	1	18	-999	-999	-999	-999	-999	-999	-999	-999	-999	-999	-999	-999	-999	0	-999	383	500	2.643	161.2	3.526	151.4	3.352	167.1	-0.88	9.8	-0.84038	0.4667
	c46	2	4	1	13	-999	-999	-999	-999	-999	-999	-999	-999	-999	-999	-999	-999	-999	0	-999	389	-999	2.385	164.1	4.188	167.1	-999	-999	-1.8	-3	-1.82051	-0.05252
	c47	2	4	1	13	-999	-999	-999	-999	-999	-999	-999	-999	-999	-999	-999	-999	-999	0	-999	-999	-999	2.266	161.2	-999	-999	-999	-999	-999	-999	-999	-999
	c48	2	4	2	17	-999	-999	-999	-999	-999	-999	-999	-999	-999	-999	-999	-999	-999	0	-999	-999	-999	0.2039	143.5	-999	-999	-999	-999	-999	-999	-999	-999
	c49	2	4	2	14	-999	-999	-999	-999	-999	-999	-999	-999	-999	-999	-999	-999	-999	0	-999	-999	-999	-999	-999	-999	-999	-999	-999	-999	-999	-999	-999
	c50	2	4	1	14	-999	-999	-999	-999	-999	-999	-999	-999	-999	-999	-999	-999	-999	0	-999	-999	-999	3.208	122	-999	-999	-999	-999	-999	-999	-999	-999
	c51	2	4	1	12	-999	-999	-999	-999	-999	-999	-999	-999	-999	-999	-999	-999	-999	0	-999	364	332	-999	-999	0.4745	221.9	0.5168	182.7	-999	-999	-999	-999
	c52	2	4	2	20	-999	-999	-999	-999	-999	-999	-999	-999	-999	-999	-999	-999	-999	0	-999	364	377	1.259	169	1.779	125.9	2.139	171	-0.52	43.1	-0.45366	1.81749
	c53	2	4	1	15	-999	-999	-999	-999	-999	-999	-999	-999	-999	-999	-999	-999	-999	0	-999	473	-999	1.376	192.5	3.126	192.5	-999	-999	-1.75	0	-1.76405	0.06917
	c54	2	4	2	14	-999	-999	-999	-999	-999	-999	-999	-999	-999	-999	-999	-999	-999	0	-999	410	329	3.168	200.4	4.079	194.5	4.043	194.5	-0.91	5.9	-0.87021	0.3085
	c55	2	4	1	19	-999	-999	-999	-999	-999	-999	-999	-999	-999	-999	-999	-999	-999	0	-999	375	360	1.639	171	1.264	163.1	1.57	192.5	0.38	7.9	0.49984	0.38963
	c56	2	4	1	15	-999	-999	-999	-999	-999	-999	-999	-999	-999	-999	-999	-999	-999	0	-999	351	377	1.08	172.9	1.824	153.3	1.119	147.5	-0.74	19.6	-0.6923	0.86423
	c57	2	4	1	22	-999	-999	-999	-999	-999	-999	-999	-999	-999	-999	-999	-999	-999	0	-999	382	-999	2.068	129.8	1.339	127.8	-999	-999	0.73	2	0.87698	0.1503
	c58	2	4	1	20	-999	-999	-999	-999	-999	-999	-999	-999	-999	-999	-999	-999	-999	0	-999	364	309	1.231	171	2.097	157.3	1.996	162	-0.87	13.7	-0.82227	0.6249
	c59	2	4	1	11	-999	-999	-999	-999	-999	-999	-999	-999	-999	-999	-999	-999	-999	0	-999	504	-999	-999	-999	0.209	149.4	-999	-999	-999	-999	-999	-999
	c60	2	4	2	13	-999	-999	-999	-999	-999	-999	-999	-999	-999	-999	-999	-999	-999	0	-999	-999	-999	-999	-999	-999	-999	-999	-999	-999	-999	-999	-999
	c61	2	4	2	11	-999	-999	-999	-999	-999	-999	-999	-999	-999	-999	-999	-999	-999	0	-999	-999	-999	1.673	178.8	-999	-999	-999	-999	-999	-999	-999	-999
	c62	2	4	1	13	-999	-999	-999	-999	-999	-999	-999	-999	-999	-999	-999	-999	-999	0	-999	-999	-999	0.9313	182.7	-999	-999	-999	-999	-999	-999	-999	-999
	c63	2	4	1	11	-999	-999	-999	-999	-999	-999	-999	-999	-999	-999	-999	-999	-999	0	-999	-999	-999	1.872	207	-999	-999	-999	-999	-999	-999	-999	-999
